# Supplementary material
Source: publisher figshare collection journal article supplement (https://frontiersin.figshare.com/ndownloader/files/12469526)
Supplement: Supplementary file [file 12469526]

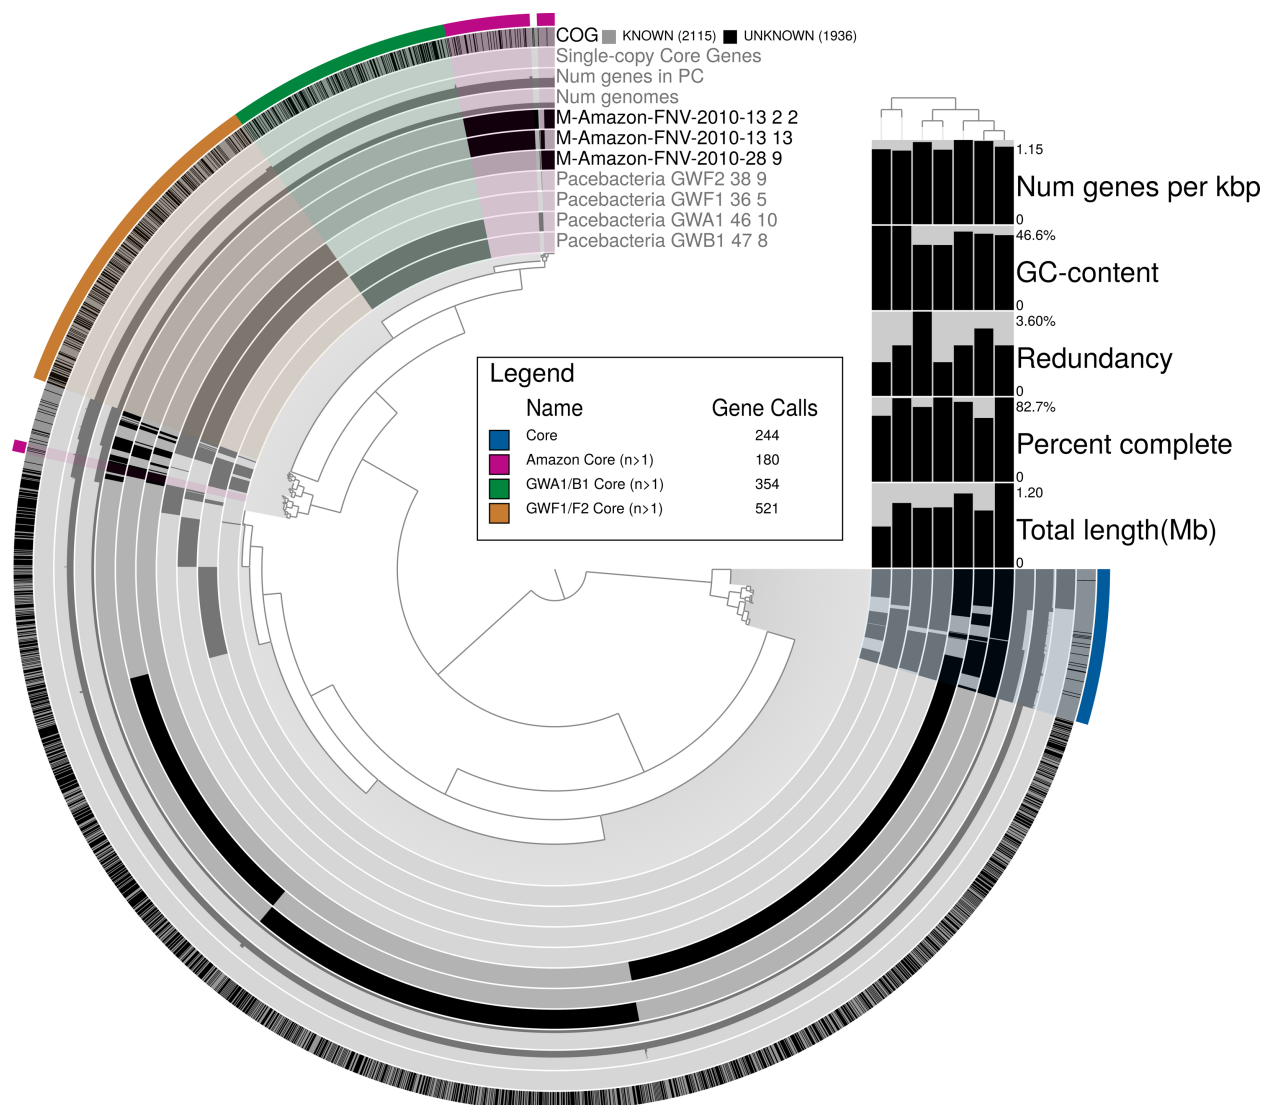

**FIGURE S5** A pangenome analysis of *Candidatus* Pacebacteria and the three Amazon MAGs most closely related to *Candidatus* Pacebacteria. The “core” proteins found in the 7 genomes analyzed are highlighted in blue. The “core” of the Amazon pangenome is highlighted in pink. The “core” pangenome for *Candidatus* Pacebacteria genomes GWA1 and GWA1 are highlighted in green and the “core” for *Candidatus* Pacebacteria genomes GWF1 and GWF2 are highlighted in orange. The number of genes per kilobase pair, GC content, percent redundancy, percent completion, and total length of each genome are visualized in the bar chart. PC = protein cluster.
